# Supplementary material
Source: PubMed Central journal article supplement (PMC4620526)
Supplement: Supp_Table1.pdf [file Supp_Table1.pdf]

## Supplementary Data

SUPPLEMENTARY TABLE S1. THE CHEMICAL PROFILE OF CI<sub>SCFE</sub>

| <i>Number</i> | <i>Components</i>           | <i>Percentage</i>  |
|---------------|-----------------------------|--------------------|
| 1             | Camphene                    | 0.475 <sup>a</sup> |
| 2             | $\beta$ -Cymene             | 0.998 <sup>a</sup> |
| 3             | Eucalyptol                  | 3.091 <sup>a</sup> |
| 4             | Linalool oxide              | 0.521 <sup>a</sup> |
| 5             | $\alpha$ -Thujone           | 2.186 <sup>a</sup> |
| 6             | $\beta$ -Thujone            | 2.169 <sup>a</sup> |
| 7             | Isothujol                   | 1.094 <sup>a</sup> |
| 8             | L-Pinocarveol               | 0.765 <sup>a</sup> |
| 9             | d-Camphor                   | 8.582 <sup>a</sup> |
| 10            | Cis-Verbenol                | 4.720 <sup>a</sup> |
| 11            | Endo-Borneol                | 7.845 <sup>a</sup> |
| 12            | L-4-Terpineol               | 1.634 <sup>a</sup> |
| 13            | $\alpha$ -Terpineol         | 1.022 <sup>a</sup> |
| 14            | Myrtenol                    | 1.054 <sup>a</sup> |
| 15            | Cumaldehyde                 | 0.486 <sup>a</sup> |
| 16            | Bornyl acetate              | 2.948 <sup>a</sup> |
| 17            | Thymol                      | 3.071 <sup>a</sup> |
| 18            | $\beta$ -Caryophyllene      | 3.336 <sup>a</sup> |
| 19            | Cis- $\beta$ -Farnesene     | 2.270 <sup>a</sup> |
| 20            | $\alpha$ -Curcumene         | 5.932 <sup>a</sup> |
| 21            | $\sigma$ -Cadinene          | 1.815 <sup>a</sup> |
| 22            | Spathulenol                 | 1.362 <sup>a</sup> |
| 23            | Caryophyllene oxide         | 8.460 <sup>a</sup> |
| 24            | $\gamma$ -Eudesmol          | 1.568 <sup>a</sup> |
| 25            | T-Muurolol                  | 1.487 <sup>a</sup> |
| 26            | $\alpha$ -Gurjunene         | 2.161 <sup>a</sup> |
| 27            | Aromadendrene               | 2.280 <sup>a</sup> |
| 28            | $\alpha$ -Bisabolol         | 2.289 <sup>a</sup> |
| 29            | Cubanol                     | 1.742 <sup>a</sup> |
| 30            | Longifolenaldehyde          | 2.572 <sup>a</sup> |
| 31            | $\alpha$ -Bisabolol oxide   | 2.600 <sup>a</sup> |
| 32            | Hexahydrofarnesyl acetone   | 1.212 <sup>a</sup> |
| 33            | Ethyl hexadecanoate         | 1.362 <sup>a</sup> |
| 34            | $\alpha$ -Linolenic acid    | 2.130 <sup>a</sup> |
| 35            | Ethyl octadec-9,12-dienoate | 2.470 <sup>a</sup> |
| 36            | Chlorogenic acid            | 2.110 <sup>b</sup> |
| 37            | Luteolin-7-glucoside        | 2.800 <sup>b</sup> |
| 38            | Linarin                     | 4.830 <sup>b</sup> |
| 39            | Luteolin                    | 1.140 <sup>b</sup> |

<sup>a</sup>Determined by GC-MS analysis, and the relative percentage calculated by integrated peak area in Agilent MSD Chemstation data analysis program.

<sup>b</sup>Analyzed and quantified by HPLC-PAD analysis, and the relative percentage was represented by the content quantitatively analyzed with peak areas under the standard curves.

CI<sub>SCFE</sub>, *C. indicum* super-critical carbon dioxide fluid extract; GC-MS, gas chromatography-mass spectrometry; HPLC-PAD, high-performance liquid chromatography photodiode array detector.
